# Supplementary material for: Environmentally friendly synthesis of graphene–silver composites with surface-enhanced Raman scattering and antibacterial activity via reduction with l-ascorbic acid/water vapor
Source: Royal Society of Chemistry journal article supplement (doi:10.1039/c5nj00414d), 2015-01-01
Supplement: c5nj00414d1.pdf [file c5nj00414d1.pdf]

## Supporting Information

Environmentally friendly synthesis of graphene-silver composites with surface-enhanced Raman scattering and antibacterial activity via reduction with L-ascorbic acid/water vapor

Jian Liu<sup>a</sup>, Libin Liu<sup>a\*</sup>, Xiwen Wu<sup>a</sup>, Xiaokai Zhang<sup>b</sup>, Tianduo Li<sup>a\*</sup>

<sup>a</sup> Shandong Provincial Key Laboratory of Fine Chemicals, Key Laboratory of Fine Chemicals in Universities of Shandong, Qilu University of Technology, Jinan 250353, China

E-mail: [lbliu@qlu.edu.cn](mailto:lbliu@qlu.edu.cn) (Prof. L. B. Liu); [litianduo@163.com](mailto:litianduo@163.com) (Prof. T. D. Li)

<sup>b</sup> Institute of Semiconductors, Shandong Normal University, No. 88 East Culture Road, Jinan, China

### Materials Characterization

UV-Vis absorption spectra were recorded on a UV-2600 UV-vis spectrometer (Shimadzu, Japan). Fourier-transform infrared spectroscopy (FT-IR) spectra were obtained on a FT-IR spectrometer IR Prestige-21 (Shimadzu, Japan). X-ray diffraction (XRD) analyses of the GO, RGO and RGO/Ag samples were carried out on a D-8 ADVANCE X-ray diffractometer (Bruker AXS, Germany) with graphite monochromatized Cu K $\alpha$  irradiation ( $\lambda = 1.54 \text{ \AA}$ ) with a voltage of 40 kV and current of 40 mA. Thermogravimetric analysis (TGA) was conducted in a continuous nitrogen flow with a flow rate of 150 mL min<sup>-1</sup> and a heating rate of 10 °Cmin<sup>-1</sup> from room temperature to 850 °C using a SDT Q600 (TA, America). X-ray photoelectron spectroscopy (XPS) measurements were taken in a ESCALAB 250 (Thermo Fisher

Scientific, America) using a monochromatic Al-K $\alpha$  X-ray source at 100 W. The surface and cross-section images of the RGO/Ag films were characterized by scanning electron microscope (SEM) QUANTA 200 (FEI, America). The equilibrium contact angles (CA) were measured by a DSA 100 (KRÜSS, Germany) contact angle meter at ambient temperature. The morphology and microstructures were observed by transmission electron microscope (TEM) H-800 (HITACHI, Japan) at an accelerating voltage of 100 kV. Atomic force microscopy (AFM) images were taken on a Multimode 8 Nanoscope V system (Bruker, USA) in peak force tapping mode. Electrical measurements were performed using a four-point probe measurement station (Jandel RM3-AR Test Meter with Multiheight Probe attachment), and the average of three data points per sample was recorded.

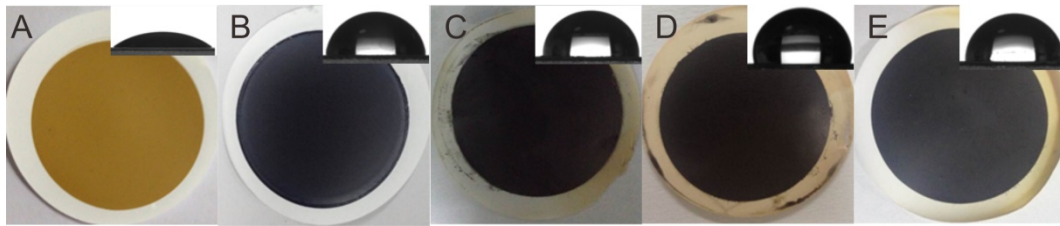

**Figure S1.** Pictures of (A) GO, (B) RGO, (C) Ag2G1, (D) Ag5G1 and (E) Ag10G1 films, and the equilibrium water contact angles:  $37.2 \pm 0.5^\circ$ ,  $88.8 \pm 0.5^\circ$ ,  $98.2 \pm 0.5^\circ$ ,  $106.5 \pm 0.5^\circ$  and  $97.3 \pm 0.5^\circ$ , respectively.

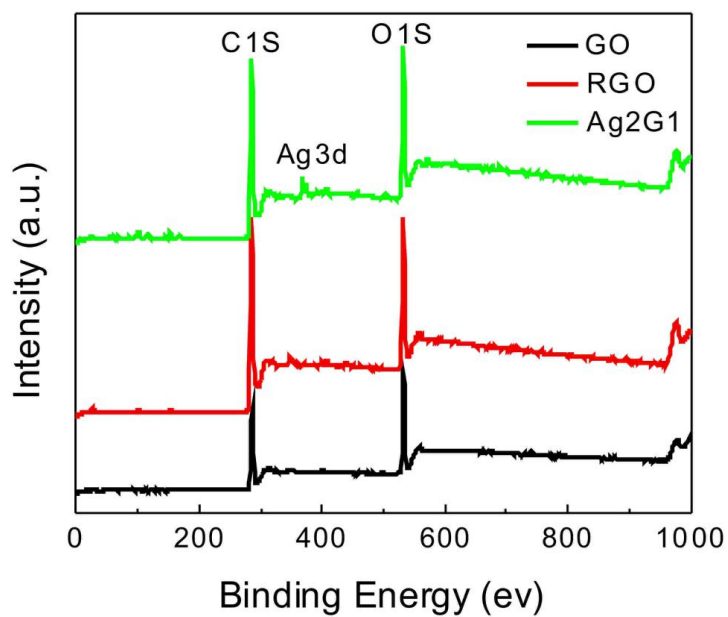

**Figure S2.** XPS survey spectra of the as-prepared GO and RGO and Ag2G1 composites.

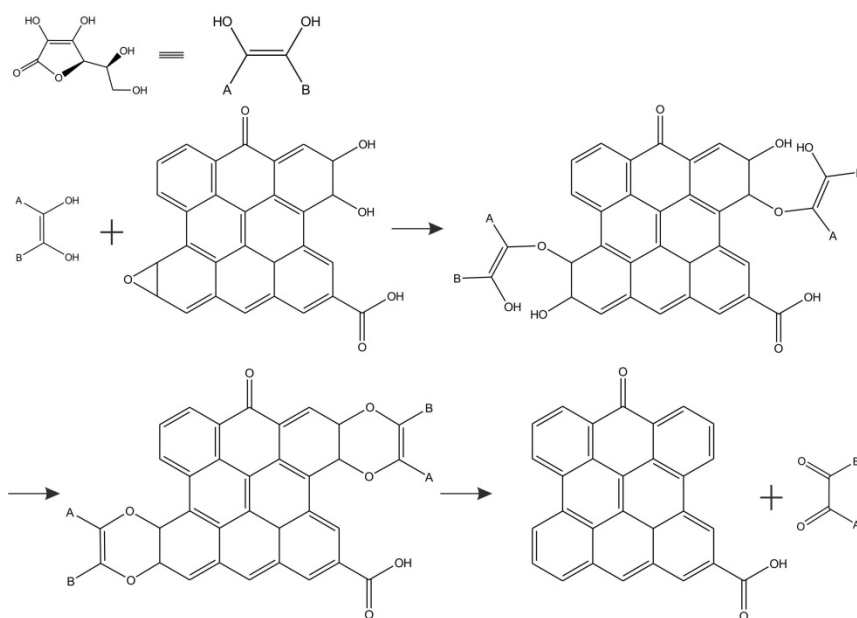

**Figure S3.** Reaction pathway for the chemical reduction of GO with L-AA.
